# Supplementary material
Source: publisher site journal article supplement (https://www.dovepress.com/article/332659)
Supplement: Supplementary file 1 [file get_supplementary_file.php]

**Supplemental Information**

**Supplemental Table S1 Primers for quantitative real-time PCR**

| Gene | Sequence of forward primers（5' to 3'） | Sequence of reverse primers（5' to 3'） |
| --- | --- | --- |
| *Ucp1* | CAG GCT TCC AGT ACC ATT AGG | GTA CAG TTT CGG CAA TCC TTC |
| *Prdm16* | CCA CCA GAC TTC GAG CTA CG | ACA CCT CTG TAT CCG TCA GCA |
| *Pgc-1α* | ATC TGG GTG GGA GAG GAT ACT | TAG GTG TCA GGA CAA AGG ACA |
| *PPARγ* | GGC AAA GCA TTT GTA TGA CTC | GTG ATT TGT CCG TTG TCT |
| *Ampk* | GCC AAA TCA GGG ACT GCT A | GGT GAC AGA TGA GGT AAG GGA |
| *Bckdha* | CAG GAG GAG GTG CTG AAG TTC | CCG CTG GGA CTC ATA GAG AAT |
| *Bckdhb* | CGA ACT GTC ATG GAT ATT GGC | CAC GCA CTC CTT AAA GCA TTC |
| *Dbt* | ATT TCA GTG ACC TTC AGC GAG | TTT CCC ATG TGG CTC TTC TTA |
| *Dld* | ATG CTA TTG GAG ATG TGG TCG | CCT TCA ACA CAG ATG ATG CCT |
| *Bckdk* | GCA GAA GTG ATT TCA AGG TTC | GAA AGA CTT GTT CAA TGA GCC |
| *Bcat2* | GCA AGC AAC TCC ACA TAC CTA | GCT CCG TAC TGA ATA GCC TTC |
| *Actb* | CCT CTA TGC CAA CAC AGT | AGC CAC CAA TCC ACA CAG |

**Supplemental Table S2 Antibodies for western blot**

| Antibody | Antibody name | Supplier | Catalog No. | Dilution |
| --- | --- | --- | --- | --- |
| Antibody | UCP1（D9D6X）Rabbit mAb | Cell Signaling Technology | 14670S | 1:1000 |
| Antibody | SIRT1(D1D7)Rrabbit mAb | Cell Signaling Technology | 9475S | 1:1000 |
| Antibody | AMPKα antibody | Cell Signaling Technology | 2532S | 1:1000 |
| Antibody | Phospho-AMPKα (Thr172) antibody | Cell Signaling Technology | 2531S | 1:1000 |
| Antibody | GAPDH Rabbit mAb | Cell Signaling Technology | 5174T | 1:1000 |
